# Supplementary material for: Seroprevalence of Antibodies to SARS-CoV-2 in Rural Households in Eastern Uganda, 2020-2022
Source: PubMed Central journal article supplement (PMC9932849; doi:10.1001/jamanetworkopen.2022.55978), 2023-02-15
Supplement: jamanetwopen-e2255978-s002.pdf [file jamanetwopen-e2255978-s002.pdf]

## Data Sharing Statement

Briggs. Seroprevalence of Antibodies to SARS-CoV-2 in Rural Households in Eastern Uganda, 2020-2022. *JAMA Netw Open*. Published February 15, 2023.

doi:10.1001/jamanetworkopen.2022.55978

### Data

**Data available:** Yes

**Data types:** Deidentified participant data, Data dictionary

**How to access data:** Upon publication, data will be available here:

[https://github.com/EPPIcenter/PBC\\_Covid\\_serology](https://github.com/EPPIcenter/PBC_Covid_serology). After the Prism Border Cohort study has been completed (which will occur after this publication date), all data pertaining to the cohort will be hosted using the ClinEpiDB platform: <https://clinepidb.org/ce/app>.

**When available:** With publication

### Supporting Documents

**Document types:** None

### Additional Information

**Who can access the data:** Data will be available to anyone through a public repository on Github.

**Types of analyses:** For any purpose.

**Mechanisms of data availability:** Data will be accessible without discussing with the investigators on this project.
